# Supplementary material for: Stable water isotope monitoring network of different water bodies in Shiyang River Basin, a typical arid river in China
Source: Copernicus journal article supplement (doi:10.5194/essd-2021-465), 2022-02-10
Supplement: Supplementary file [file essd-2021-465-RC1-supplement.pdf]

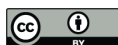

# Stable water isotope monitoring network of different water bodies in Shiyang River Basin, a typical arid river in China

Guofeng Zhu<sup>a,b,\*</sup>, Yuwei Liu<sup>a,b</sup>, Peiji Shi<sup>a,b</sup>, Wenxiong Jia<sup>a,b</sup>, Junju Zhou<sup>a,b</sup>, Yuanfeng Liu<sup>a,b</sup>, Xinggang Ma<sup>a,b</sup>, Hanxiong Pan<sup>a,b</sup>, Yu Zhang<sup>a,b</sup>, Zhiyuan Zhang<sup>a,b</sup>, Zhigang Sun<sup>a,b</sup>, Leilei Yong<sup>a,b</sup>, Kailiang Zhao<sup>a,b</sup>

5 <sup>a</sup>College of Geography and Environment Science, Northwest Normal University, Lanzhou 730070, Gansu, China

<sup>b</sup>Shiyang River Ecological Environment Observation Station, Northwest Normal University, Lanzhou 730070, Gansu, China

*Correspondence to:* Guofeng Zhu (zhugf@nwnu.edu.cn)

**Abstract.** Ecosystems in arid areas are fragile and are easily disturbed by various natural and human factors. The purpose of this study is to clarify the hydrological and ecological processes of arid inland river basins in Eurasia and provide a scientific basis for their sustainable development. From 2015 to 2020, we took the Shiyang River Basin, which has the highest utilization rate of water resources and the most prominent contradiction of water use, as a typical demonstration basin to establish and improve the isotope hydrology observation system. The data in the observation system are classified by water type (precipitation, river water, lake water, groundwater, soil water, and plant water). Six observation systems with stable isotopes as the main observation elements, including river source region, oasis region, reservoir channel system region, oasis farmland region, ecological engineering construction region, and salinization process region, have been built, and meteorological and hydrological data have also been collected. We will gradually improve the various observation systems, increase the data of observation sites, and update the data set yearly. We can use these data to carry out hydrometeorological and ecological scientific research and provide a scientific basis for water resources utilization and ecological environment restoration in arid areas. The datasets are available at <https://data.mendeley.com/datasets/d5kzm92nn3/1> (Zhu et al., 2021).

20 **Keywords.** Stable isotopes; Monitoring network; Shiyang River Basin; Arid river

## 1 Introduction

Arid areas account for 33% of the world's total land area and are characterized by a lack of water vapor sources and fragile ecosystems, which are easily disturbed by various natural and human factors (Qin and Thomas, 2014; Arheimer et al., 2017; Alam et al., 2019). Global and regional climate change exacerbate the uncertainty of water resources (Chen et al., 2017; Thompson et al., 2000; Zhang et al., 2021). In addition, under the influence of human activities, rivers' hydrological



and ecological processes in arid areas, especially in the middle and lower reaches, have changed, resulting in many ecological and environmental problems (Gibson et al., 2016; Grill et al., 2015; Shah et al., 2021). To clarify the hydrological process of the arid inland river basin of great significance to other arid regions in the world.

Although stable isotopes such as  $\delta^2\text{H}$  and  $\delta^{18}\text{O}$  account for a small proportion in natural water bodies, they respond quickly to ~~historical records of~~ environmental changes and water cycle evolution (Vandenschrick et al., 2002; Hah et al., 2020). Stable isotopes provide a useful means of studying regional and global water cycles (Craig, 1961; Vallet-Coulomb et al., 2008; Bowen et al., 2012; Gibson et al., 2016). However, isotopic fractionation runs through every link of the water cycle (Song et al., 2017; Dansgaard, 1964). The hydrogen and oxygen isotopic compositions of different water bodies are influenced by isotopic fractionation (Gu, 1995; Risi et al., 2010a; Sun et al., 2012; Min et al., 2018). At the same time, isotope fractionation may occur in hydrogen and oxygen isotope experiments. For example, the physical and chemical properties of soil may lead to the fractionation of hydrogen and oxygen in soil water (Meissner et al., 2014). In addition, incomplete extraction of water during cryogenic distillation may lead to isotope fractionation (Orlowski et al., 2016). We have always known the existence of these "problems", but compared with traditional hydrological methods, the high accuracy of isotope measurement technology and its resistance to external factors have made it widely used in the fields of hydrology, water resources, and the water cycle, and become an effective tool for solving many major scientific problems (Gat et al., 1996; Kralik et al., 2004; Li and Garziona, 2017). In particular, precipitation-surface water-soil water-groundwater can be regarded as a unified "system" to quantitatively study the hydraulic connection between different water bodies (Burns et al., 1998; Gudkov et al., 2021; Zannoni et al., 2019). Due to the limitations of sampling time, sampling space, and the experimental analysis, there has been a lack of comprehensive research on different water bodies in the same area over a long time, which makes it challenging to study the water cycle in a specific area by using stable isotope comparison.

We have established an isotope hydrology observation system in the Shiyang River Basin, which is the earliest developed area in the arid area of northwest China and has the most prominent contradiction of water resources and ecological environment problems. We collected stable water isotope data and meteorological and hydrological data from 2015 to 2020 in the Shiyang River Basin and compiled them into a data set. Due to systematic error and sampling, there are

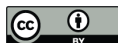

some errors in isotopic measurement results. However, the observation accuracy is affected by the operation characteristics of the instrument and the sensitivity difference of moisture to specific spectral absorption, and the observation results usually have obvious nonlinear response problems. Our work will help clarify the impact of the local water cycle and human activities on agricultural production in the Shiyang River Basin, analyze the development trend of inland river basins under global climate change, promote ecological restoration, and provide some scientific reference for the eco-hydrological research in other arid areas.

## 2 Study area

The Shiyang River Basin (36°29'N-39°27'N, 101°41'E-104°16'E) is located in the eastern Qilian Mountain and Hexi Corridor. The topography of the Shiyang River Basin slopes sharply from southwest to northeast, with Qilian Mountains in the south, alluvial plains and Gobi in the middle, and flood plains and deserts in the north (Zhu et al., 2020). The river is about 250 km long and covers an area of  $4.16 \times 10^4$  km<sup>2</sup>. There are five hydrological stations in the Shiyang River Basin, Miscellaneous Wood Temple, JTL, CQQ, Nanying Reservoir, and Huanyang River Reservoir, with average annual flows of 7.33 m<sup>3</sup>/s, 10.07 m<sup>3</sup>/s, 9.15 m<sup>3</sup>/s, 3.92 m<sup>3</sup>/s, and 3.86 m<sup>3</sup>/s, respectively. From south to north, the Shiyang River Basin covers three different climatic regions: the southern Qilian Mountain area has an alpine and semi-arid climate, with an annual average temperature below 6 °C and precipitation of 300-600 mm; the central corridor plain has a dry climate, the annual average temperature is between 6-8 °C, and the precipitation is 150-300 mm; the north has an arid climate, with an annual average temperature higher than 8 °C and precipitation less than 150mm (Zhu et al., 2021a). The precipitation in the Shiyang River Basin is mainly concentrated in summer (71.54 mm), with the least precipitation in winter (4.22 mm); the average evaporation in summer (713.45 mm) is the largest, while the average evaporation in winter (164.4 mm) is the smallest (Appendix B Figure. B1). The irrigation system for surface water and groundwater is complete in the Shiyang River Basin, with irrigated 4.6 million hectares of cultivated land.



### 3 Observation network design

From 2015 to 2020, we set up 16 meteorological observation stations, 53 hydrological observation stations, 19 soil and vegetation observation stations, and 20 mu of experimental observation plots in the Datan Township. For the convenience of data recording, each monitoring point is recorded in short form. Appendix A Table A1 presents the complete names, abbreviations, and corresponding meteorological parameters of each sampling point so that readers can match the data set. 8334 samples were collected, including 1406 precipitation samples, 1324 surface water samples, 170 groundwater samples, 4825 soil water samples, and 609 plant water samples. Figure 1 shows the distribution of six observation systems: river source region, oasis region, reservoir channel system region, oasis farmland region, ecological engineering construction region, and salinization process region. Based on the isotope data, we have carried out the following studies: studied the evaporation and the water vapor cycle in the Shiyang River Basin (Zhu et al., 2018), analyzed the runoff source and material transport in the runoff producing area of the arid area (Zhou et al., 2020; Ma et al., 2019), so as to clarify the sources of atmospheric and surface water; analyzed the influence of reservoir on the water cycle and studied the influence of ecological water transfer project on the water cycle (Zhu et al., 2021a), so as to clarify the influence of reservoir and ecological water transfer on the hydrological process, and quantify the influence of climate change and human activities on hydrology and water resources of the basin.

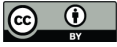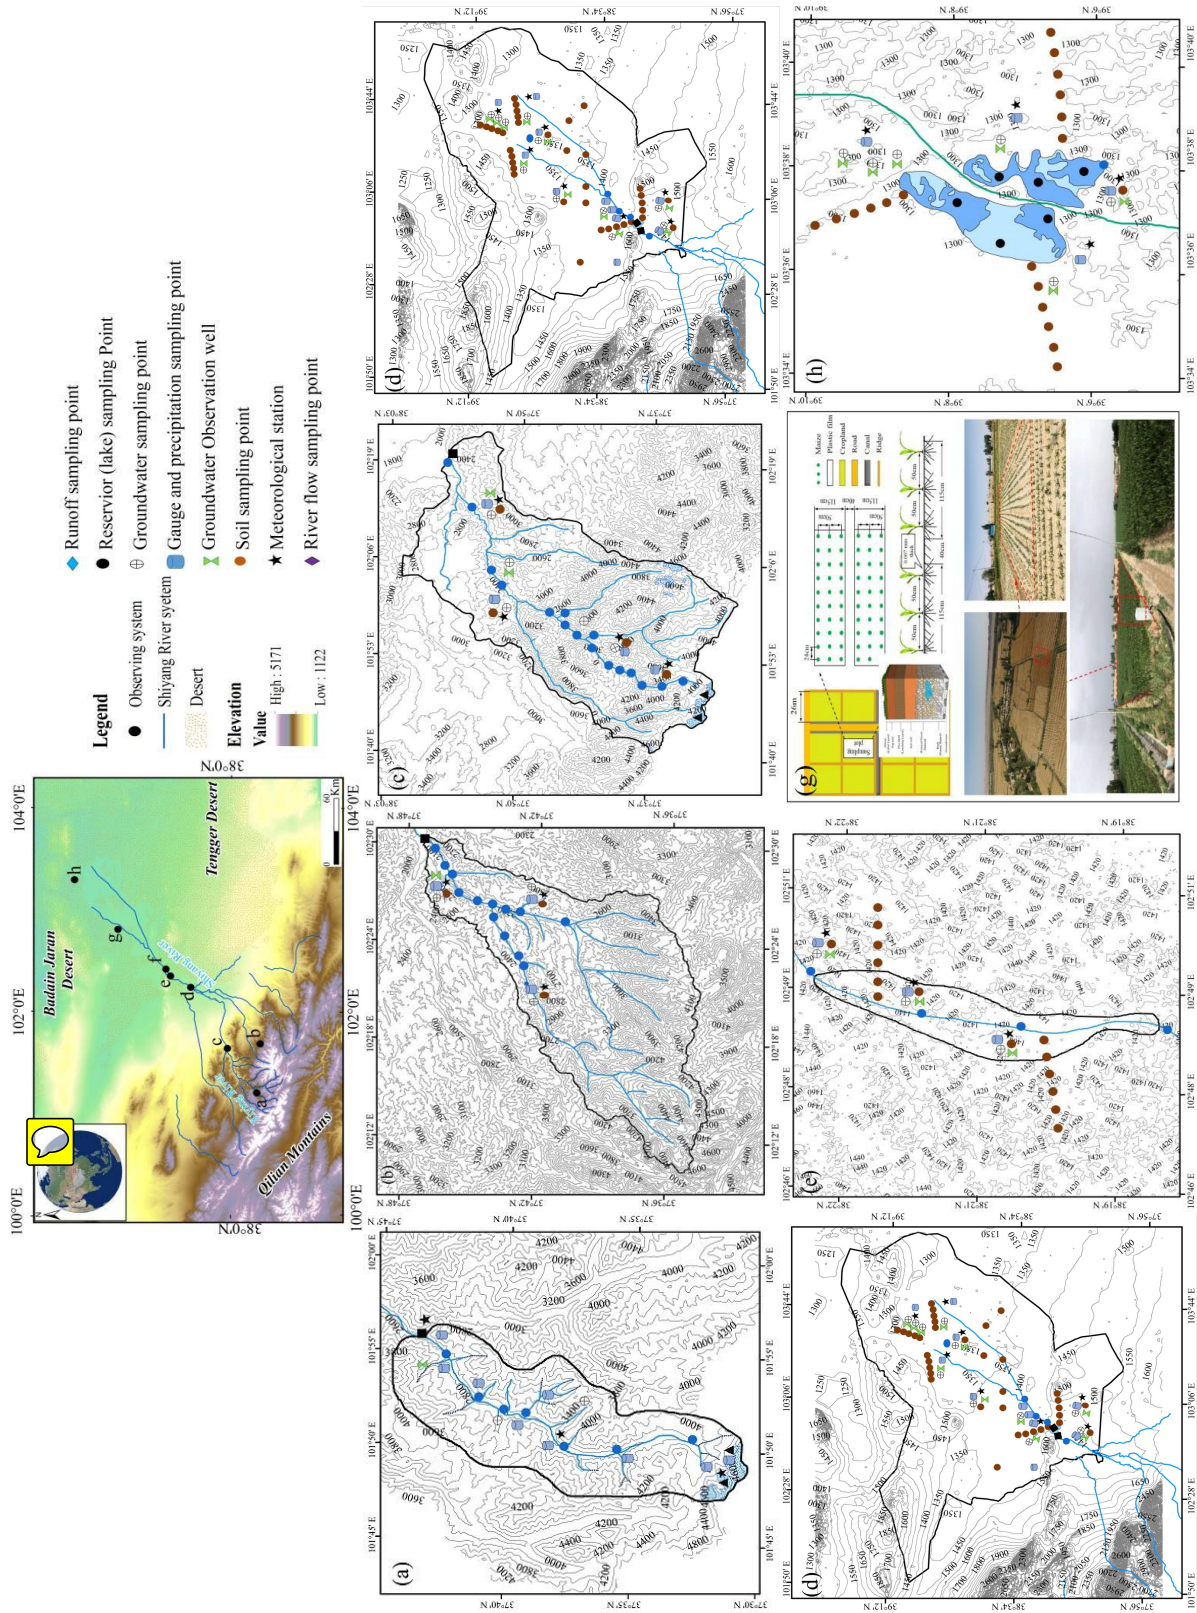



90 **Figure. 1 Shiyang River Basin Monitoring Network (a: Ningchang River observation system, river source area; b: Ice trench observation system, river source area; c: Xiying River Basin, source observation system; d: Minqin soil system, oasis area; e: Dongtan Wetland Observation system, ecological engineering construction region; f: Hongyashan reservoir canal observation system, reservoir channel system region; g: Datan Farmland observation system, oasis farmland area; h: Qingtu Lake observation system, salinization process area)**

## 4 Data and Methods

### 4.1 Sample collection

#### 95 4.1.1 Collection of precipitation

We use standard rain gauges to collect precipitation. The rain gauge is placed in an open outdoor area and consists of rain gear, funnel, water bottle, and rain cup. The diameter of the rain gear is 20 cm, and the port of the device is horizontal. The height of the rain opening of the instrument is set to be 70 cm above the ground level. We placed an anti-evaporation polythene ball at the funnel mouth and added a layer of paraffin oil to the bottom of the container to prevent isotope fractionation caused by evaporation. After each precipitation event, we immediately transfer the collected liquid precipitation to a 100 mL high-density sample bottle. For solid precipitation, we transfer it to a high-density polyethylene sample bottle after the solid precipitation becomes liquid water at room temperature (23°C). We use Parafilm to seal the plastic bottle and at the same time affix a label with the date of collection, the type of precipitation (rain, snow, hail), and the amount of precipitation on the bottle. We stored the collected samples in a freezer at a temperature of about 4°C for experimental testing.

#### 4.1.2 Collection of surface water and groundwater

We collect surface water (river water, lake water, reservoir water) in polyethylene bottles. We stratified samples at different depths (surface, middle, and bottom). We collected groundwater samples from groundwater monitoring wells of the Shiyang River Basin Administration Bureau, China Hydrology Bureau, and Gansu Hydrology Bureau. We seal polythene bottles with sealing film and label them with the date of sampling, depth of sampling, condition of tributaries, and mainstream.

#### 4.1.3 Collection of soil and plant water

We collected soil at a depth of 100 cm and collected soil samples every 10 cm. The upper reaches of the Shiyang River Basin are dominated by clay, while the middle and lower reaches are dominated by clay and sandy soil. Table 1 shows the soil characteristics of farmland areas in the Shiyang River Basin. We divided the soil sample into two parts, one part into 50 mL glass bottles. The other samples were placed in 50 mL aluminum boxes, and soil water content was measured by the drying method since 2019.

**Table 1 Basic information of soil samples (Zhu et al., 2021b)**



| Soil depth (cm) | Clay (%) | Silt (%) | Sand (%) | Soil bulk density (g/cm <sup>3</sup> ) |
|-----------------|----------|----------|----------|----------------------------------------|
| 0-10            | 10.20    | 38.85    | 50.95    | 1.05                                   |
| 10-20           | 12.94    | 37.76    | 49.30    | 1.19                                   |
| 20-30           | 10.33    | 44.23    | 45.44    | 1.30                                   |
| 30-40           | 13.48    | 38.69    | 47.83    | 1.18                                   |
| 40-50           | 12.01    | 35.09    | 52.90    | 1.14                                   |
| 50-60           | 11.21    | 42.83    | 45.96    | 1.21                                   |
| 60-70           | 10.34    | 42.98    | 46.68    | 1.21                                   |
| 70-80           | 11.09    | 38.96    | 49.95    | 1.11                                   |
| 80-90           | 11.75    | 37.72    | 50.53    | 1.20                                   |
| 90-100          | 7.21     | 35.97    | 56.82    | 1.27                                   |

120 For trees and shrubs, we collect stems, and for herbs, we collect non-green parts at the junction of rhizomes. When sampling, we use scissors to collect vegetation stems, peel off the bark, put them in 50 mL glass bottles, and freeze them until experimental analysis. Table 2 shows the plant information.

**Table 2 Basic information of plant samples**

| Sampling points | Vegetation types                                                | Sample size |
|-----------------|-----------------------------------------------------------------|-------------|
| BDZ             | Agropyron cristatum                                             | 30g ±0.5    |
| CQQ             | Corn (stem), reed, jujube (Branches), dryland willow (Branches) | 30g-100g    |
| DT              | Reed                                                            | 30g±0.5     |
| DTX             | Spring wheat (stem), corn (root, stem)                          | 30g±0.5     |
| HJX             | Willow (Branches)                                               | 100g±0.5    |
| HLD             | Qinghai Spruce (Branches)                                       | 100g±0.5    |
| HLZ             | Qinghai Spruce (Branches)                                       | 100g±0.5    |
| WWPD            | Corn (stem), wheat (stem)                                       | 30g±0.5     |
| XYWG            | Poplar (Branches), wheat                                        | 100g±0.5    |
| YXB             | Corn (stem)                                                     | 30g±0.5     |
| SWX             | Corn, wheat (stem)                                              | 30g±0.5     |
| LLL             | Salsola purpurea                                                | 30g±0.5     |

#### 4.1.4 Collection of meteorological data

125 The local meteorological data were obtained by the automatic weather stations (watchdog 2000 series weather stations) erected near the sample plot. Meteorological data include temperature (°C), relative humidity (%), atmospheric pressure (hPa), dew point temperature (°C), and precipitation (mm).

## 4.2 Experiment analysis

### 4.2.1 Water extraction experiment

130 We use vacuum condensation to extract the water from soil and plant. The extraction equipment is LI-2100 automatic vacuum condensation extraction equipment. Before water extraction, the soil and plant samples need to be taken out of the



refrigerator to thaw, and each sample bottle should be stuffed with a small ball of cotton to prevent the water from evaporating. When extracting water, we set the extraction time to 150 minutes (180 minutes for plants), the temperature to 190°C, the upper limit of the vacuum pressure to 800 Pa, and the leakage rate to 0. The water evaporates from the soil or plant sample by heating it for a specified time and then freezes it in a liquid nitrogen cold trap. After the extraction, the sample is thawed at room temperature, and then we use a 1 mL syringe to extract the water sample into a labeled sample bottle, seal it and wait for the isotope experiment.

#### 4.2.2 Isotope experiment

All the water samples were analyzed in the stable isotope laboratory of Northwest Normal University using liquid water isotope analysis (DLT-100, Los Gatos Research, USA). Each water sample and isotope standard samples were injected six times in a row. To eliminate the instrument memory effect, we discarded the first two injections and used the average of the last four times as the final result. The result of the isotope measurement is expressed by the symbol "δ" and expressed in thousandths of the difference relative to the Vienna Standard Mean Ocean Water (Craig, 1961):

$$\delta_{sample} (\text{‰}) = \left[ \left( \frac{R_{sample}}{R_{v-smow}} \right) - 1 \right] \times 1000 \quad (1)$$

In the formula,  $R_{sample}$  is the ratio of  $^{18}\text{O}/^{16}\text{O}$  or  $^2\text{H}/^1\text{H}$  in the collected sample,  $R_{v-smow}$  is the ratio of  $^{18}\text{O}/^{16}\text{O}$  or  $^2\text{H}/^1\text{H}$  in the Vienna standard sample. The analytical accuracy of  $\delta^2\text{H}$  and  $\delta^{18}\text{O}$  are  $\pm 0.6\text{‰}$  and  $\pm 0.2\text{‰}$ , respectively.

#### 4.2.3 Calibration of plant water isotope data

If the water sample contains compounds with the same wavelength absorption characteristics, it will lead to the measurement error of the laser liquid water analyzer. The most error-causing contaminants are methanol and ethanol. Therefore, we used deionized water and different concentrations of pure methanol and ethanol, combined with Los Gatos LWIA-Spectral Contamination Identifier V1.0 Spectral analysis software, to measure the pollution degree of methanol (NB) and ethanol (BB). The  $\delta^2\text{H}$  and  $\delta^{18}\text{O}$  correction methods for pollution spectra were established (Brand et al., 2009; West et al., 2010). Correction results for methanol its broadband measurements of NB metric logarithmic respectively with  $\Delta\delta^2\text{H}$  and  $\Delta\delta^{18}\text{O}$  are significantly quadratic curve relationship, respectively is:

$$\Delta\delta^2\text{H} = 0.018(\ln\text{NB})^3 + 0.092(\ln\text{NB})^2 + 0.388\ln\text{NB} + 0.785 (R^2 = 0.991, p > 0.0001) \quad (2-1)$$

$$\Delta\delta^{18}\text{O} = 0.017(\ln\text{NB})^3 - 0.017(\ln\text{NB})^2 + 0.545\ln\text{NB} + 1.356 (R^2 = 0.998, p < 0.0001) \quad (2-2)$$

Its broadband measurements for ethanol correction results in BB metric and  $\Delta\delta^2\text{H}$  and  $\Delta\delta^{18}\text{O}$ , a quadratic curve and linear relationship respectively, are:

$$\Delta\delta^2\text{H} = -85.67\text{BB} + 93.664 (R^2 = 0.747, p = 0.026) (\text{BB} < 1.2) \quad (2-3)$$





$$\Delta\delta^{18}\text{O} = -21.421\text{BB}^2 + 39.935\text{BB} - 19.089 \quad (R^2 = 0.769, \quad p < 0.012) \quad (2-4)$$

## 155 4.3 Data quality

For meteorological and hydrological data, we use Manner-Kendall to test, eliminate outliers and use interpolation to fill in the missing values. We use LWIA post analysis to detect the original isotope data. LWIA software can automatically check the instrument's fault prompts and provide a batch of optional data filtering methods. Through LWIA, we can know which original data values of samples are wrong and need to be tested again and see the cause of the data error. At the same  
160 time, we will also use SPSS software to check the normality of the obtained isotope data. At present, the impact on data quality mainly comes from the following aspects:

### 4.3.1 Sample collection

When collecting precipitation samples, the precipitation was not transferred to the high-density sample bottle immediately, resulting in the enrichment of  $\delta^2\text{H}$  and  $\delta^{18}\text{O}$ .

165 The error is caused by collecting vegetation samples mainly from the samples' collection process. If the sampling time is too long, the contact time between vegetation and air becomes longer, which causes evaporation of vegetation water.

The error in collecting soil samples is that we collected soil samples that contained many microorganisms. The influence of soil microbial activities on the results of extracted water isotopes is poorly understood. When isotope values are measured by isotope mass spectrometry, the increased  $\text{CO}_2$  concentration released during bacterial growth leads to further  
170 errors.

### 4.3.2 Experiment

The experimental error is mainly because we set the same water extraction parameters for samples with different soil characteristics. It is difficult to make post-mortem corrections for soil properties or the effects of extraction conditions because such information is rarely reported, and massive variability in method details is common (Walker et al., 1994). In  
175 addition, there are still measurement uncertainties in the process of water extraction, which also come from the loss of water vapor and the non-temperature heating temperature during the vacuum of the extraction system.



We only consider methanol and ethanol pollution in the calibration of plant sample data, but the plant and soil water extracts may contain various other pollutants. In addition, studies have shown that the mismatch between xylem and plant water sources is due to the fractionation of isotopes in the process of water absorption (Poca et al., 2019), which questioned the fact that plants did not undergo fractionation during the process of water absorption (Porporato, 2001; Meissne et al., 2014) this traditional view. However, there is no better solution, so we still use traditional methods to collect samples and conduct experiments.

## 5 Data set

### 5.1 Meteorological and hydrological data set

We obtained the meteorological data includes temperature ( $^{\circ}\text{C}$ ), relative humidity (%), air pressure (hPa), dew point temperature ( $^{\circ}\text{C}$ ), and precipitation (mm). We store the obtained weather data in the corresponding weather station file. The obtained hydrological data includes annual runoff ( $\text{m}^3/\text{s}$ ), daily average flow ( $\text{m}^3/\text{s}$ ), daily average water level (m), and the inflow of Qingtu Lake and its change.

### 5.2 Stable water isotope data set

The stable water isotope data set is compiled from Fig. 2. Firstly, we conducted field sampling to obtain samples of different water bodies. According to the samples' types, the samples can be divided into two categories: precipitation, river water, lake water, and groundwater can be directly tested after filtration, while soil samples and vegetation samples need to be vacuum condensed and extracted to separate the water in soil and vegetation for testing and analysis. The assembly of the data set relies mainly on the monitoring data and instrument-tested data. The extraction apparatus's use is BJL - 2200 fully automatic vacuum condensate extraction system. The analysis instrument is LWIA - 24 d liquid water isotope analyzer. The stable isotope data set and the meteorological and hydrological data set are combined into one data set.

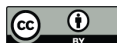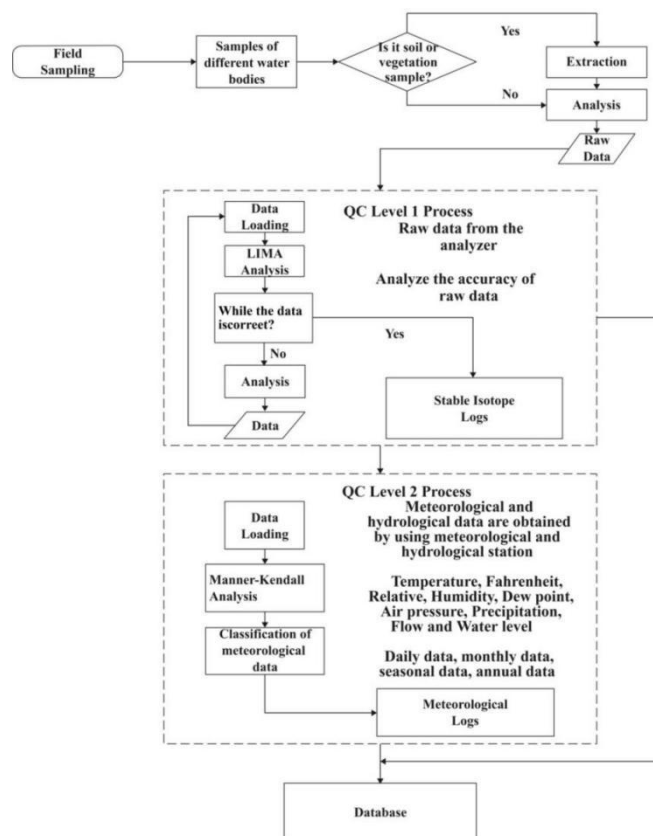

**Figure. 2 Extraction, analysis of the instrument and data set production process**

## 6 Results and Discussion

### 200 6.1 Changes in runoff

Runoff is an essential part of the water cycle. According to Fig. 3, we can know that the flow has obvious seasonal changes, with a large flow in summer and a small flow in winter. However, CQQ's flow changes are more complicated. As the downstream marker station, CQQ's cross-section runoff changes directly reflect the intensity of interference to human activities in the middle reaches. The flow of CQQ dropped sharply in June, followed by a sharp decline in April due to the agricultural water diversion for irrigation from April to June. According to Table 4, we can see that the average annual flow of JTL in the upper reaches of the Shiyang River Basin is the largest (10.07 m<sup>3</sup>/s), while that of Huangyang River Reservoir is the smallest (3.86 m<sup>3</sup>/s), reflecting the spatial characteristics that the average annual flow of hydrological stations in Shiyang River Basin gradually decreases from west to east and from south to north.



The annual flow dispersion coefficient can characterize the relative change trend between inter-annual changes in regional flow. According to Table 3, we can see that the variation range of the dispersion coefficient of discharge at the five hydrological stations in the Shiyang River Basin is 0.03-0.11, indicating that the inter-annual variation of the Shiyang River is relatively large. Among them, CQQ has the largest dispersion coefficient of 0.11, which is related to the strong interference of CQQ by human activities.

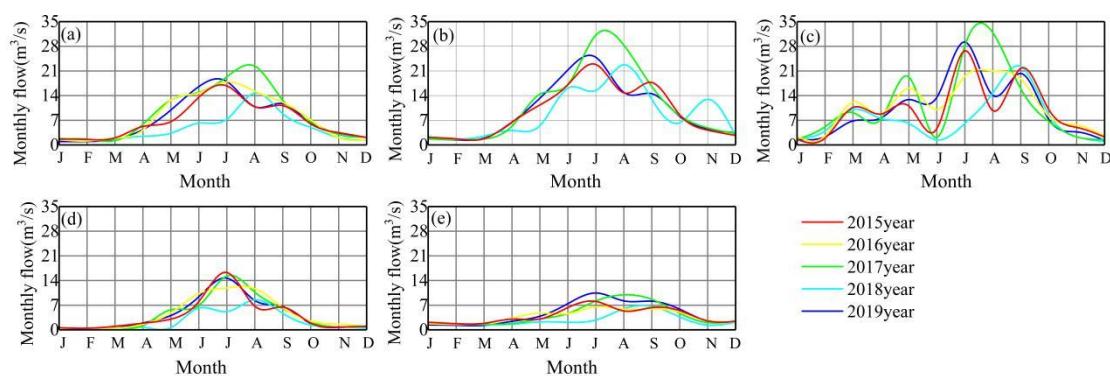

215 **Figure. 3 Changes in the monthly average flow of five hydrological stations in the Shiyang River Basin, (a) Miscellaneous wood temple, (b) JTL, (c) CQQ, (d) Nanying Reservoir, (e) Huangyang River Reservoir**

**Table 3 Inter-annual variation of flow in the Shiyang River Basin**

| Hydrological station      | Average annual flow (m <sup>3</sup> /s) | Dispersion coefficient of flow | Average annual precipitation (mm) | Annual average evaporation (mm) |
|---------------------------|-----------------------------------------|--------------------------------|-----------------------------------|---------------------------------|
| Miscellaneous wood temple | 7.33                                    | 0.05                           | 351.68                            | 1084.56                         |
| JTL                       | 10.07                                   | 0.06                           | 319.15                            | 990.66                          |
| CQQ                       | 9.15                                    | 0.11                           | 126.82                            | 840.75                          |
| Nanying Reservoir         | 3.92                                    | 0.09                           | 242.62                            | 1097.75                         |
| Huangyang River Reservoir | 3.86                                    | 0.03                           | 325.02                            | 1060.55                         |

## 6.2 Stable isotopes characteristics of different water bodies

In the catchment dominated by precipitation, the seasonal difference between  $\delta^2\text{H}$  and  $\delta^{18}\text{O}$  values is large. We can see that the changes of  $\delta^2\text{H}$  and  $\delta^{18}\text{O}$  in different water bodies are roughly the same (Fig. 4), showing good consistency and all present seasonal changes. The variation of isotopes of river water, lake water, and groundwater lags behind that of precipitation, which is related to the time difference between surface runoff and underground runoff formed by precipitation.



Precipitation  $\delta^2\text{H}$  and  $\delta^{18}\text{O}$  change in a cosine shape with time. That is, they are depleted in winter and spring and enriched in summer and autumn. This is related to the dilution of precipitation in winter and spring and strong evaporation in summer and autumn. Precipitation  $\delta^2\text{H}$  and lake water  $\delta^2\text{H}$  have large variability (the absolute value of the coefficient of variation are 0.82 and 0.7, respectively), and the precipitation  $\delta^{18}\text{O}$  and plant water  $\delta^{18}\text{O}$  have large variability (the absolute value of the coefficient of variation is 0.69 and 0.91, respectively). The strong evaporation of lake water in summer and the weak evaporation in other seasons make the seasonal fluctuations of lake water isotopes large. The plant water also has strong seasonal fluctuations in the isotope of plant water due to the strong transpiration in summer.

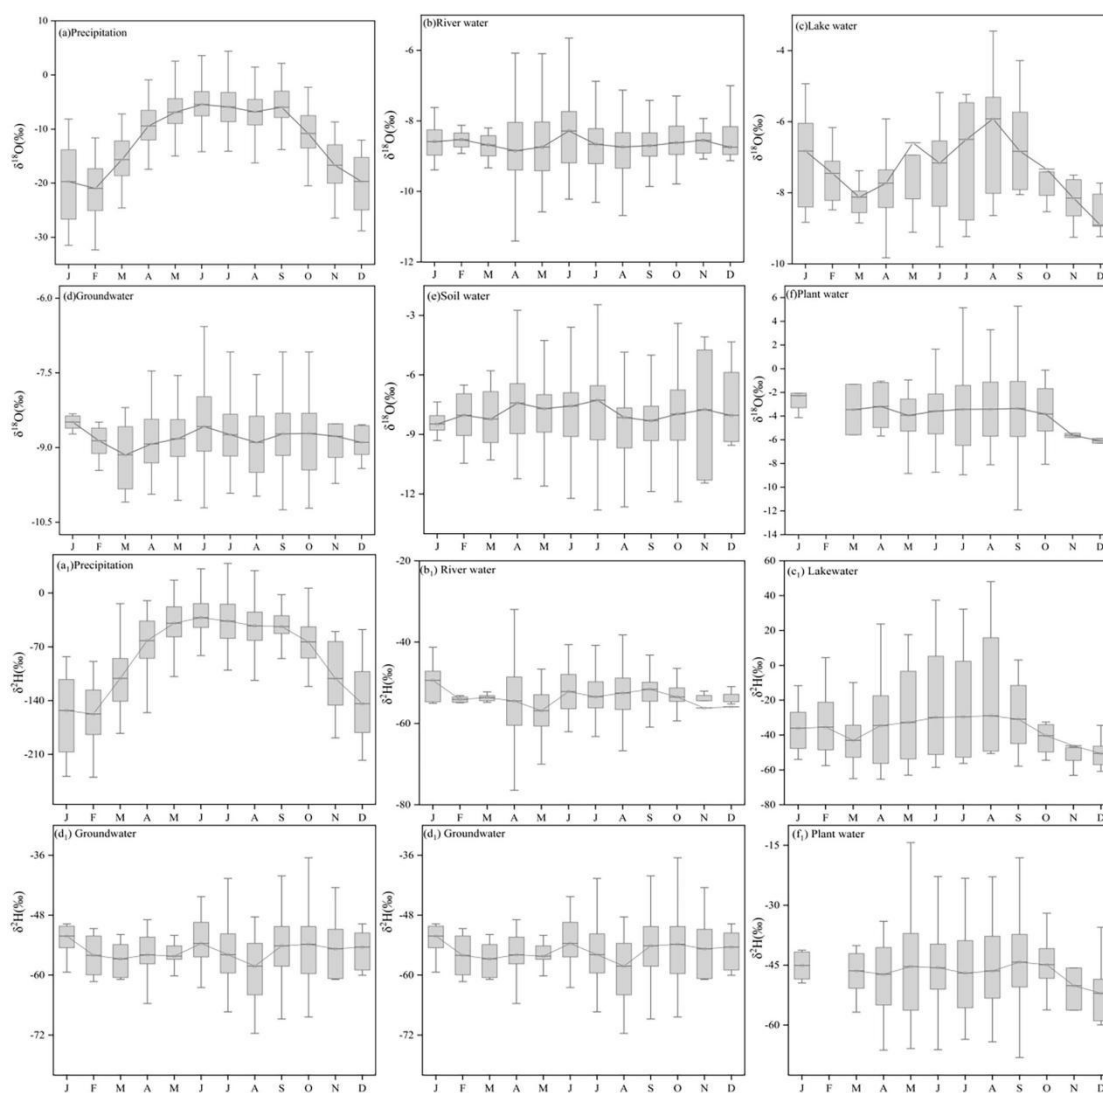

230

Figure. 4 Distribution of different water bodies'  $\delta^2\text{H}$  and  $\delta^{18}\text{O}$  in the Shiyang River Basin from 2015 to 2020



### 6.3 Connections between different bodies of water

According to Fig. 5, we used the least square method to obtain the local meteoric water line equation (LMWL):  
 $\delta^2\text{H}=7.65\delta^{18}\text{O} + 9.75$ , its slope and intercept are smaller than those of GMWL, but  $\delta^2\text{H}$  and  $\delta^{18}\text{O}$  maintain a good linear  
235 relationship ( $R^2=0.96$ ), which is related to the geographical location of the study area. The Shiyang River Basin is located in  
the Northwest inland of China, and it is subject to intense below-cloud evaporation, making the slope and intercept relatively  
small. It also reflects the existence of a stable isotope unbalanced fractionation effect under the arid climate background.

Precipitation, river water, lake water, groundwater, soil water, and plant water are distributed near GMWL, indicating  
that they share the same water source. The deviation of the lake from GMWL indicates that it experienced intense  
240 evaporation. By comparing the slope and intercept of the relation expressions  $\delta^2\text{H}$  and  $\delta^{18}\text{O}$  of GMWL and different water  
bodies, it can be seen that, as far as the slope is concerned, precipitation is the highest (7.65), followed by groundwater  
(5.11), lake water is the lowest (2.14). There is little difference between the slope of precipitation and groundwater, which  
means there is a mutual recharge relationship. In terms of intercept (d), the precipitation was the highest (d=9.75), followed  
by the river (d=-8.44). The light isotopes evaporate preferentially when the water body evaporates in the unsaturated  
245 atmosphere. The combined effect of the dynamic fractionation effect of the river accelerates the ratio of the  $\delta^2\text{H}$  and  $\delta^{18}\text{O}$   
fractionation effects in the evaporated water vapor, resulting in an increase in d in the water vapor and a decrease in d in the  
remaining water body. The average value of  $\delta^2\text{H}$  and  $\delta^{18}\text{O}$  of soil water is between plant water and precipitation, but closer to  
precipitation (Table 4), indicating that the soil is mainly recharged by precipitation. In the  $\delta^2\text{H}$  and  $\delta^{18}\text{O}$  equations of  
precipitation, lake water, soil water, river water, plant water, and groundwater,  $R^2$  decreases in turn, and the linear  
250 relationship between  $\delta^2\text{H}$  and  $\delta^{18}\text{O}$  becomes smaller and smaller. These phenomena indicate that different water bodies have  
different degrees of mutual complementary. Among them, soil water is the most miscible and is supplied by multiple water  
sources.

The correlation coefficient between  $\delta^2\text{H}$  and  $\delta^{18}\text{O}$  of lake water, groundwater, and plant water is relatively low. The  
evaporation of lake water in summer is particularly intense, which leads to a great difference in winter and summer. The  
255 stable isotopic value of lake water varies significantly in different seasons, leading to a small correlation coefficient between  
them. The main recharge source of groundwater and plant water is precipitation. It takes a certain time for precipitation to



converge into surface water and groundwater, leading to isotopic fraction, leading to a small correlation coefficient between  $\delta^2\text{H}$  and  $\delta^{18}\text{O}$  of the two water bodies.

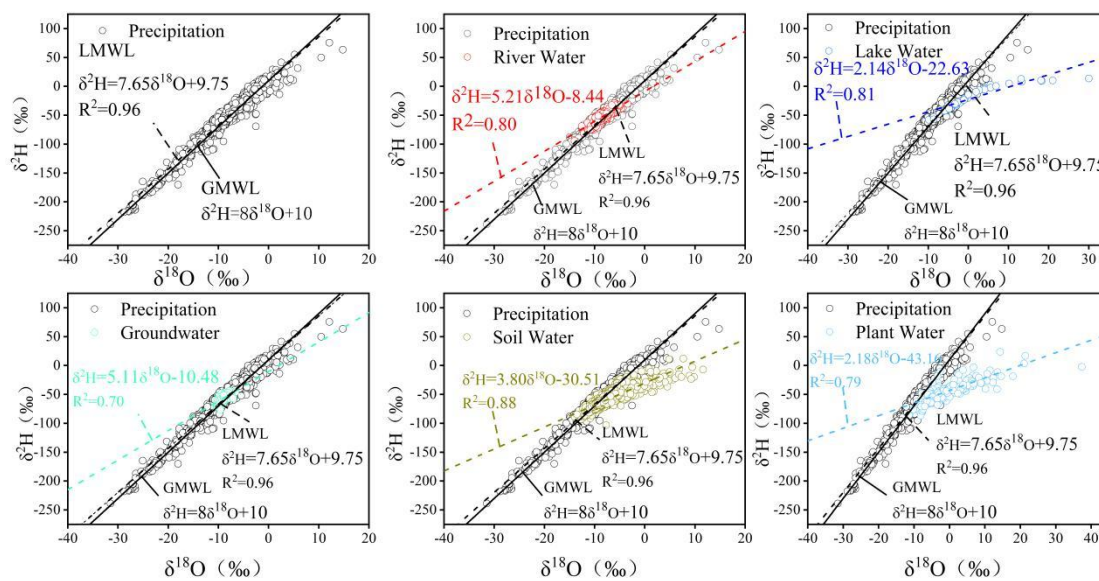

260 **Figure. 5 The change of  $\delta^2\text{H}$  and  $\delta^{18}\text{O}$  in different water bodies in the Shiyang River Basin**

**Table 4 Comparison of  $\delta^2\text{H}$  and  $\delta^{18}\text{O}$  in different water bodies in the Shiyang River Basin**

| Water Type    | $\delta^2\text{H}(\text{‰})$ |        |         |                          | $\delta^{18}\text{O}(\text{‰})$ |       |         |                          |
|---------------|------------------------------|--------|---------|--------------------------|---------------------------------|-------|---------|--------------------------|
|               | Min                          | Max    | Average | Coefficient of variation | Min                             | Max   | Average | Coefficient of variation |
| Precipitation | -238.62                      | 75.41  | -54.63  | -0.85                    | -31.22                          | 14.79 | -8.39   | -0.71                    |
| River Water   | -94.14                       | -28.89 | -53.37  | -0.12                    | -13.98                          | -3.44 | -8.62   | -0.11                    |
| Lake Water    | -57.84                       | 13.56  | -18.43  | -1.11                    | -9.86                           | 30.01 | 1.96    | 4.40                     |
| Groundwater   | -76.99                       | -43.72 | -52.42  | -0.10                    | -10.44                          | -6.57 | -8.80   | -0.08                    |
| Soil Water    | -102.95                      | 11.81  | -59.39  | -0.20                    | -13.94                          | 11.62 | -7.61   | -0.37                    |
| Plant Water   | -86.41                       | 23.87  | -48.15  | -0.32                    | -11.43                          | 37.37 | -2.27   | -2.54                    |

## 7 Data availability

The data that support the findings of this study are openly available at <https://data.mendeley.com/datasets/d5kzm92nn3/1>.

## 8 Summary and outlook

265 From 2015 to 2020, we took the Shiyang River Basin, which has the highest utilization rate of water resources and the most prominent contradiction of water use, as a typical demonstration basin to establish and improve the isotope hydrology observation system. We collected 8334 stable water isotope data, which were compiled into a data set along with



270 meteorological and hydrological data. Through the analysis, we can know that: (1) The slope and intercept of LMWL in the Shiyang River Basin are both smaller than GMWL, indicating that there is an obvious below-cloud evaporation effect in the Shiyang River Basin. (2) The main source of runoff recharge in the Shiyang River Basin is precipitation, and the proportion of snowmelt water and groundwater is relatively low. (3) The accumulation degree of stable isotopes in the reservoir is greater than that in other surface waters, indicating that the reservoir construction has changed the original natural evaporation pattern of the basin. This data set provides a new basis for studying the stable water isotopes of different water bodies in the inland river basins.

275 Due to systematic error, there are some errors in isotopic measurement results. However, the observation accuracy is affected by the operation characteristics of the instrument and the sensitivity difference of moisture to specific spectral absorption, and the observation results usually have obvious nonlinear response problems, which require a lot of experimentation.





280 Appendix A

281 Table. A1 List of basic parameters

| Abbreviation | Full name                                | Longitude | Latitude | Elevation (m) | Average annual air temperature (°C) | Average annual precipitation (mm) | Sampling type (abbreviation) | Sampling type (full name)                            | Location |
|--------------|------------------------------------------|-----------|----------|---------------|-------------------------------------|-----------------------------------|------------------------------|------------------------------------------------------|----------|
| QHLYXM       | Qinghai Forestry Project                 | 101°51'   | 37°32'   | 3899          | -                                   | -                                 | hs                           | river water                                          | a        |
| MK           | Colliery                                 | 101°51'   | 37°33'   | 3647          | -0.20                               | 595.10                            | hs                           | precipitation                                        | a        |
| BDZ          | Transformer Substation                   | 101°51'   | 37°33'   | 3637          | -                                   | -                                 | tr, zw, hs                   | soil, plant, river water                             | a        |
| LLL          | Lenglong Ling                            | 101°28'   | 37°41'   | 3500          | 5.78                                | 350.34                            | Js, zw                       | precipitation, plant water                           | a        |
| SDHHC        | Tunnel Junction                          | 101°50'   | 37°34'   | 3448          | -                                   | -                                 | hs                           | river water                                          | a        |
| LXWL         | Winding Road                             | 101°50'   | 37°34'   | 3305          | -                                   | -                                 | hs                           | river water                                          | a        |
| NQ           | Ningqian                                 | 101°49'   | 37°37'   | 3235          | -                                   | -                                 | hs                           | river water                                          | a        |
| SCG          | Ningtanhe Middle East branch mixed water | 101°50'   | 37°38'   | 3068          | -                                   | -                                 | hs, js, tr                   | river water, precipitation, soil                     | a        |
| MTQ          | Wood Bridge                              | 101°53'   | 37°41'   | 2741          | -                                   | -                                 | hs                           | river water                                          | a        |
| HLZ          | Ranger Stations                          | 101°53'   | 37°41'   | 2721          | 3.24                                | 469.44                            | hs, js, tr, zw, dxs          | river water, precipitation, soil, plant, groundwater | a        |
| SCLK         | Three-way Intersection                   | 101°55'   | 37°43'   | 2590          | -                                   | -                                 | hs                           | river water                                          | a        |
| JTL          | Nine Ridge                               | 102°02'   | 37°51'   | 2267          | -                                   | -                                 | dxs                          | groundwater                                          | a        |
| WGQ          | The Bridge of the Cultural Revolution    | 102°07'   | 37°53'   | 2174          | -                                   | -                                 | hs                           | river water                                          | a        |
| BGH          | Binggou River                            | 102°17'   | 37°40'   | 2872          | 5.28                                | -                                 | hs, tr,                      | river water, soil                                    | b        |
| LKS          | Two Pine                                 | 102°17'   | 37°40'   | 2832          | 5.69                                | -                                 | hs, tr                       | river water, soil                                    | b        |
| QSHSY        | Spring River                             | 102°22'   | 37°38'   | 2747          | -                                   | -                                 | qs                           | spring water                                         | b        |
| JCLK         | Intersection                             | 102°20'   | 37°41'   | 2544          | -                                   | -                                 | hs, tr                       | river water, soil                                    | b        |
| QXZ          | Meteorological Station                   | 102°20'   | 37°42'   | 2543          | 3.34                                | 510.56                            | js, dxs                      | precipitation, groundwater                           | b        |
| YHRJ         | A family                                 | 102°20'   | 37°42'   | 2543          | -                                   | -                                 | hs                           | river water                                          | b        |
| SGZZ         | Sigou stackade                           | 102°23'   | 37°40'   | 2492          | 10.34                               | 675.54                            | hs                           | river water                                          | b        |
| SYQ          | Laboratory Area                          | 102°22'   | 37°42'   | 2438          | -                                   | -                                 | hs, tr                       | river water, soil                                    | b        |
| JZGD         | Construction Site                        | 102°25'   | 37°41'   | 2303          | -                                   | -                                 | hs                           | river water                                          | b        |
| XCL          | Small Valley                             | 102°24'   | 37°43'   | 2267          | -                                   | -                                 | hs                           | river water                                          | b        |
| NCHHLH       | South Nancha River                       | 102°26'   | 37°43'   | 2163          | -                                   | -                                 | hs                           | river water                                          | b        |
| HLD          | Confluence                               | 102°26'   | 37°44'   | 2146          | -                                   | -                                 | hs, tr, zw                   | river water, soil, plant                             | b        |
| NYSKRK       | Nanying Reservoir                        | 102°29'   | 37°47'   | 1955          | 7.82                                | 330.16                            | hs                           | river water                                          | b        |
| XBZ          | Xuebai Toen                              | 103°01'   | 38°32'   | 1387          | 10.77                               | -                                 | js                           | precipitation                                        | b        |
| GGKFQ        | Reform and Opening Bridge                | 101°58'   | 37°46'   | 2590          | -                                   | -                                 | hs                           | river water                                          | c        |
| HJX          | Huajian Township                         | 102°00'   | 37°50'   | 2390          | 7.65                                | 262.64                            | hs, dxs, js, tr              | river water, groundwater, precipitation, soil        | c        |
| XYSK         | Xiying Reservoir                         | 102°12'   | 37°54'   | 2058          | -                                   | -                                 | hs                           | river water                                          | c        |



|       |                      |         |        |      |       |        |                      |                                                      |   |
|-------|----------------------|---------|--------|------|-------|--------|----------------------|------------------------------------------------------|---|
| XYWG  | Xiyiing Wugou        | 102°10' | 37°53' | 2097 | 7.99  | 197.67 | hs, js, tr, zw       | river water, precipitation, soil, plant              | c |
| XYZ   | Xiyiing Town         | 102°26' | 37°58' | 1748 | 10.44 | 491.35 | js                   | precipitation                                        | c |
| WW    | Wuwei                | 102°37' | 37°53' | 1581 | 5.23  | 300.14 | hs                   | river water                                          | c |
| ZZXL  | Zhuaxi Xiulong       | 103°20' | 37°18' | 3556 | -2.37 | 500.17 | js                   | precipitation                                        | d |
| QLX   | Qilian Township      | 102°42' | 38°08' | 3394 | 5.13  | 300.15 | js, qs               | precipitation, spring water                          | d |
| BHZ   | Protection Station   | 102°29' | 38°09' | 2787 | -     | -      | dxs                  | groundwater                                          | d |
| SCG   | Shangchigou          | 102°25' | 38°03' | 2400 | 7.28  | 377.13 | js, hs, dxs          | precipitation, river water, groundwater              | d |
| YXB   | Yangxia Dam          | 102°41' | 38°01' | 1489 | 10.76 | -      | js, dxs, tr, zw      | precipitation, groundwater, soil, plant              | d |
| WWPD  | Wuwei Basin          | 102°42' | 38°06' | 1467 | -     | -      | js, dxs, tr, zw      | precipitation, groundwater, soil, plant              | d |
| JDT   | Jiudun Beach         | 102°45' | 38°07' | 1464 | 10.54 | -      | js                   | precipitation                                        | d |
| HSR   | Hongshui River       | 102°45' | 38°13' | 1454 | -     | -      | hs                   | river water                                          | d |
| CQQ   | Caiqi Bridge         | 102°45' | 38°13' | 1443 | 5.63  | 300.26 | dxs, hs, tr, zw      | groundwater, river water, soil, plant                | d |
| HGG   | Hongqi Valley        | 102°50' | 38°21' | 1421 | 8.34  | 113.16 | js, dxs              | precipitation, groundwater                           | d |
| MQBQ  | Minqin Dam           | 103°08' | 39°02' | 1400 | 8.33  | 113.19 | tr                   | soil                                                 | d |
| XXWGZ | Xiyin Wugou Township | 102°58' | 38°29' | 1393 | -     | -      | dxs                  | groundwater                                          | d |
| SWX   | Suwu Township        | 103°05' | 38°36' | 1372 | 9.82  | 155.84 | dxs, tr, zw, hs      | groundwater, soil, plant, river water                | d |
| XXGC  | Xiaxingou Village    | 102°56' | 38°37' | 1402 | -     | -      | hs                   | river water                                          | d |
| XJG   | Xiajiangou           | 102°42' | 38°07' | 1200 | 9.36  | 110.18 | dxs                  | groundwater                                          | d |
| DT    | Dongtan              | 102°47' | 38°16' | 1434 | 8.90  | 240.05 | hs, tr, zw           | river water, soil, plant                             | e |
| HYSSK | Hongyashan Reservoir | 102°53' | 38°24' | 1416 | 7.81  | 100.17 | hs, dxs, tr          | river water, groundwater, soil                       | f |
| BDC   | Beidong Township     | 103°02' | 38°32' | 1367 | 9.52  | 155.45 | dxs                  | groundwater                                          | g |
| DTX   | Datan Township       | 103°14' | 38°46' | 1349 | 11.49 | -      | js, dxs, soi, zw, hs | precipitation, groundwater, soil, plant, river water | g |
| QTH   | Qingtu Lake          | 103°36' | 39°03' | 1313 | 7.86  | 110.79 | js, dxs, ls, tr      | precipitation, groundwater, lake water, soil         | h |



283 **Appendix B**

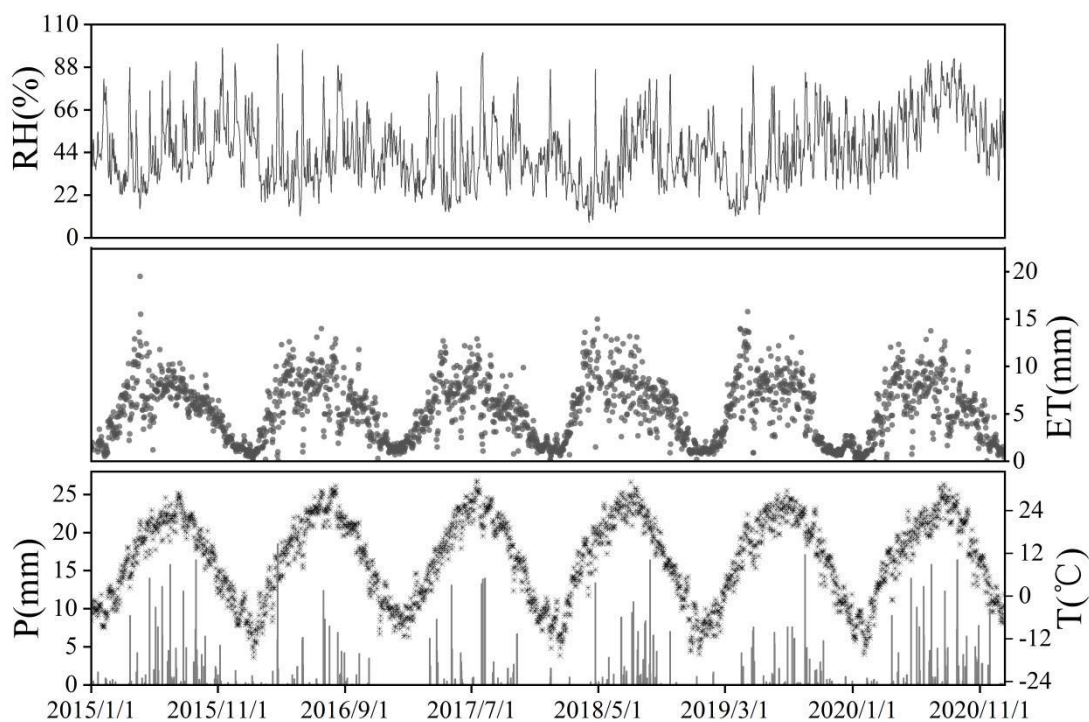

284

285 **Figure. B1** Variation of meteorological parameters over time in the Shiyang River Basin, RH represents Relative Humidity, ET  
286 represents Evaporation, P represents Precipitation, and T represents Temperature

287

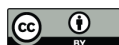

### Author contributions

Guofeng Zhu and Yuwei Liu conceived the idea of the study; Guofeng Zhu, Peiji Shi, Wenxiong Jia, and Junju Zhou  
290 set up observation system; Xinggang Ma, Hanxiong Pan, Yu Zhang, Zhiyuan Zhang, and Leilei Yong were responsible for  
field sampling; Zhigang Sun participated in the experiment; Kailiang Zhao and Yuanfeng Liu participated in the drawing;  
Yuwei Liu wrote the paper. All authors discussed the results and revised the manuscript.

### Competing interests

The authors declare no competing interests.

### 295 Acknowledgement

This research was financially supported by National Natural Science Foundation of China (41867030, 41971036, 41661005).  
The authors thank the colleagues in the Northwest Normal University for their help in fieldwork, laboratory analysis, and  
data processing.

### References

- 300 Alam, S., Gebremichael, M., Li, R., Dozier, J., and Lettenmaier, D. P.: Climate change impacts on groundwater storage in  
the central valley, California, *Climatic. Change.*, 157, doi:10.1007/s10584-019-02585-5, 2019.
- Arheimer, B., Donnelly, C. and Lindstrom, G.: Regulation of snow-fed rivers affects flow regimes more than climate change,  
*Nat. Commun.*, 8, 62, doi:10.1038/s41467-017-00092-8, 2017.
- Bowen, G. J., Kennedy, C. D., Henne, P. D., and Zhang, T. L.: Footprint of recycled water subsidies downwind of Lake  
305 Michigan, *Ecosphere.*, 3, 1–16, doi:10.1890/ES12-00062.1, 2012.
- Burns, S. J., Matter, A., Frank, N., and Mangini, A.: Speleothem-based paleoclimate record from northern Oman, *Geology.*,  
26, 499–502, doi:10.1130/0091-7613(1998)0262.3.CO;2, 1998.
- Brand, W. A., Geilmann, H., Crosson, E. R., and Rella, C. W.: Cavity ring - down spectroscopy versus high - temperature  
conversion isotope ratio mass spectrometry; a case study on  $\delta^2\text{H}$  and  $\delta^{18}\text{O}$  of pure water samples and alcohol/water  
310 mixtures, *Rapid. Commun. Mass. Sp.*, 23, doi:10.1002/rcm.4083, 2009.
- Chen, Y.N., Li, Z., Fang, G.H., and D, H.J.: Research on the impact of climate change on water resources in Tianshan  
Mountains in Central Asia, *Acta. Geographica. Sinica.*, 72, 9, 2017.
- Craig, H.: Isotopic variation in meteoric waters, *Science.*, 133, 1702-1703. doi:10.1126/science.133.3465.1702, 1961.
- Dansgaard, W: Stable isotopes in precipitation, *Tellus.*, 16, 436-468, doi:10.1111/j.2153-3490.1964.tb00181.x, 1964.
- 315 Gat, J. R.: Oxygen and hydrogen isotopes in the hydrologic cycle, *Annual. Rev. Earth. Pl. Sc.*, 24, 255-262,  
doi:10.1146/ANNUREV.EARTH.24.1.225, 1996.



- Gibson, J. J., Birks, S., and Yi, Y.: Stable isotope mass balance of lakes: a contemporary perspective, *Quaternary. Sci. Rev.*, 131, 316-328, doi:10.1016/j.quascirev.2015.04.013, 2016.
- Gibson, J. J., Edwards, T., Birks, S. J., Amour, N., Buhay, W. M., Mceachern, P., Wolfe, B. B., and Peters, D. L.: Progress  
320 in isotope tracer hydrology in Canada, *Hydrol. Processes.*, 19, doi:10.1002/hyp.5766, 2010.
- Grill, G., Lehner, B., Lumsdon, A. E., Macdonald, G. K., Zarfl, C., and Reidy, L. C.: An index-based framework for  
assessing patterns and trends in river fragmentation and flow regulation by global dams at multiple scales, *Environ. Res.  
Lett.*, 10, doi:10.1088/1748-9326/10/1/015001, 2015.
- Gu, W. Z.: Using environmental isotopes and hydrological experiments to study runoff generation methods in catchment  
325 areas, *J. Hydraul. Eng.*, (005), 9-17, 1995.
- Gudkov, A. V., Tokarev, I. V., and Tolstikhin, I. N.: The formation and balance of the atmospheric precipitations, surface  
water, and groundwater on the southern slopes of the khibiny massif (based on data on the isotopic composition of oxygen  
and hydrogen), *Water. Resour.*, 48, 124-132, doi:10.1134/S0097807821010164, 2021.
- Hah, A., Nmha, B., Gls, C., Yyd, E., Bw, C., and Krh, F.: Effects of seasonal and interannual variability in water isotopes  
330 ( $\delta^2\text{H}$ ,  $\delta^{18}\text{O}$ ) on estimates of water balance in a chain of seven prairie lakes - sciencedirect, *J. Hydrol.  
X.*, doi:10.1016/j.hydroa.2020.100069, 2020.
- Kralik, M., Papesch, W., and Stichler, W.: Austrian Network of Isotopes in Precipitation (ANIP): Quality assurance and  
climatological phenomenon in one of the oldest and densest networks in the world, *Isotope Hydrology and Integrated, Water.  
Reso. Manag.*, 146-149, 2004.
- 335 Li, L., and Garzzone, C. N.: Spatial distribution and controlling factors of stable isotopes in meteoric waters on the Tibetan  
Plateau: implications for paleoelevation reconstruction, *Earth. Planet. Sci. Lett.*, 460, 302-314,  
doi:10.1016/j.epsl.2016.11.046, 2017.
- Ma, H. Y., Zhu, G. F., Zhang, Y., Pan, H. X., Guo, H. W., Jia, W. X., Zhou, J. J., Yong, L. L., and Wan, Q. Z.: The effects of  
runoff on Hydrochemistry in the Qilian Mountains: a case study of Xiying River Basin, *Environ. Earth. Sci.*, (13),  
340 doi:10.1007/s12665-019-8384-z, 2019.
- Meissner, M., Köhler, M., Schwendenmann, L., Hölscher, D., and Dyckmans, J.: Soil water uptake by trees using water  
stable isotopes ( $\delta^2\text{H}$  and  $\delta^{18}\text{O}$ ) a method test regarding soil moisture, texture and carbonate, *Plant, Soil.*, 376, 327-335,  
doi:10.1007/s11104-013-1970-z, 2014.
- Min, Z., Hu, Y., Cheng, Z., Liu, Z., Rui, Y., and Bo, C.: Effects of land cover on variations in stable hydrogen and oxygen  
345 isotopes in karst groundwater: a comparative study of three karst catchments in guizhou province, southwest China, *J.  
Hydrol.*, 565, 374-385, doi:10.1016/j.jhydrol.2018.08.037, 2018.
- Orlowski, N., Breuer, L., and McDonnell, J. J.: Critical issues with cryogenic extraction of soil water for stable isotope  
analysis. *Ecohydrology.*, 9, 1-5, 2016.
- Poca, M., Coomans, O., Urcelay, C., Zeballos, S. R., and Boeckx, P.: Isotope fractionation during root water uptake by  
350 acacia caven is enhanced by arbuscular mycorrhizas, *Plant. Soil.*, (3), doi:10.1007/s11104-019-04139-1, 2019.



- Porporato, L.: Plants in water-controlled ecosystems: active role in hydrologic processes and response to water stress, *Adv. Water. Resource.*, 24, 725-744, doi:10.1016/S0309-1708(01)00005-7, 2001.
- Qin, D. H., and Thomas, S.: Highlights of the IPCC Fifth Assessment Report by Working Group I, *Progress in Climate Change Research.*, 1-6, 2014.
- 355 Risi, C., Bony, S., Vimeux, F., Chong, M., and Descroix, L.: Evolution of the stable water isotopic composition of the rain sampled along Sahelian squall lines, *Q. J. Roy. Meteor. Soc.*, 136, 227-242, doi:10.1002/qj.485, 2010a.
- Shah, D., Shah, H. L., Dave, H. M., and Mishra, V.: Contrasting influence of human activities on agricultural and hydrological droughts in India, *Sci. Total. Environ.*, 774, doi:10.1016/j.scitotenv.2021.144959, 2021.
- Song, C., Wang, G., Liu, G., Mao, T., Sun, X., and Chen, X.: Stable isotope variations of precipitation and streamflow reveal  
360 the young water fraction of a permafrost watershed, *Hydrol. Processes.*, 31, 935-947, doi:10.1002/hyp.11077, 2017.
- Sun, X., Chen, J., Shi, G., Tan, H., and Su, Z.: Hydrogen and oxygen isotopic variations of different water bodies in evaporation and rainfall infiltration processes, *J. Agr. Eng.*, 28, 100-105, doi:10.3969/j.issn.1002-6819.2012.04.016, 2012.
- Thompson, L. G., Yao, T., Mosleythompson, E., Davis, M. E., Henderson, K. A., and Lin, P.: A high-resolution millennial record of the South Asian Monsoon from Himalayan Ice Cores, *Science.*, 289, 1916-1920,  
365 doi:10.1126/science.289.5486.1916, 2000.
- Vallet-Coulomb, C., Gasse, F., and Sonzogni, C.: Seasonal evolution of the isotopic composition of atmospheric water vapour above a tropical lake: deuterium excess and implication for water recycling, *Geochimica. Et. Cosmochimica. Acta.*, 72, 4661-4674, doi:10.1016/j.gca.2008.06.025, 2008.
- Vandenschrick, G., Wesemael, B. V., Frot, E., Pulido-Bosch, A., Molina L. b., Stiévenard, M., and Souchez, R.: Using stable  
370 isotope analysis ( $\delta D - \delta 18O$ ) to characterise the regional hydrology of the Sierra de Gador, south east Spain, *J. Hydrol.*, 265, 43-55, doi:10.1016/S0022-1694(02)00097-5, 2002.
- Walker, G. R., Woods, P. H., and Allison, G. B.: Interlaboratory comparison of methods to determine the stable isotope composition of soil water, *Chem. Geolo.*, 111, 297-306, doi:10.1016/0009-2541(94)90096-5, 1994.
- West, A. G., Goldsmith, G. R., Brooks, P. D., and Dawson, T. E.: Discrepancies between isotope ratio infrared spectroscopy  
375 and isotope ratio mass spectrometry for the stable isotope analysis of plant and soil waters, *Rapid. Commun. Mass. Sp.*, 24, 2687-2688, doi:10.1002/rcm.4685, 2010.
- Zannoni, D., Steen-Larsen, H. C., Rampazzo, G., Dreossi, G., Stenni, B., and Bergamasco, A.: The atmospheric water cycle of a coastal lagoon: an isotope study of the interactions between water vapor, precipitation and surface waters, *J. Hydrol.*, 572, 630-644, doi:10.1016/j.jhydrol.2019.03.033, 2019.
- 380 Zhang, F., Jin, G., and Liu, G.: Evaluation of virtual water trade in the yellow river delta, China, *Sci. Total. Environ.*, 784, doi:10.1016/j.scitotenv.2021.147285, 2021.
- Zhou, J. J., Zhao, Y. R., Huang, P., and Liu, C. F.: Impacts of ecological restoration projects on the ecosystem carbon storage of inland river basin in arid area, China, *Ecol. Indic.*, doi:10.1016/j.ecolind.2020.106803, 2020.

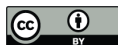

- 385 Zhu, G. F.: Data sets of Stable water isotope monitoring network of different water bodies in Shiyang River Basin, a typical arid river in China (Supplemental Edition 20210808), Mendeley Data, V1, doi: 10.17632/d5kzm92nn3.1, 2021.
- Zhu, G. F., Guo, H. W., Qin, D. H., Pan, H. X., and Ma, X. G: Contribution of recycled moisture to precipitation in the monsoon marginal zone: estimate based on stable isotope data, *J. Hydrol.*, 569, doi:10.1016/j.jhydrol.2018.12.014, 2018.
- 390 Zhu, G. F., Sang, L. Y., Zhang, Z.X., Sun, Z.G., Ma, H.Y., Liu, Y.W., Zhao, K. L., Wang, L., & Guo, H. W.: Impact of landscape dams on river water cycle in urban and peri-urban areas in the Shiyang River Basin: Evidence obtained from hydrogen and oxygen isotopes, *J. Hydrol.*, doi:10.1016/J.JHYDROL.2021.126779, 2021a.
- Zhu, G. F., Wan, Q. Z., Yong, L. L., Li, Q. Q., Zhang, Z. Y., Guo, H. W., Zhang, Y., Sun, Z.G., Zhang, Z. X., and Ma, H. Y.: Dissolved organic carbon transport in the Qilian mountainous areas of China, *Hydrol. Processes.*, 34, doi:10.1002/hyp.13918, 2020.
- 395 Zhu, G. F., Yong, L. L., Zhang, Z. X., Sun, Z. G., Wan, Q. Z., Xu, Y. X., Ma, H. Y., Sang, L. Y., Liu, Yu. W., Wang, L., Zhao, K. K., and Guo, H.W.: Effects of plastic mulch on soil water migration in arid oasis farmland: Evidence of stable isotopes, *Catena.*, doi:10.1016/J.CATENA.2021.105580, 2021b.
